# Supplementary material for: A Novel Approach for Solving CNOP and its Application in Identifying Sensitive Regions of Tropical Cyclone Adaptive Observations
Source: Copernicus journal article supplement (doi:10.5194/npg-2018-17), 2018-04-16
Supplement: Supplementary file [file npg-2018-17-AC2-supplement.zip]

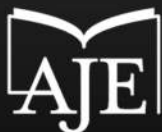

# EDITORIAL CERTIFICATE

This document certifies that the manuscript listed below was edited for proper English language, grammar, punctuation, spelling, and overall style by one or more of the highly qualified native English speaking editors at American Journal Experts.

## Manuscript title:

A Novel Approach for Solving CNOP and its Application in Identifying Sensitive Regions of Tropical Cyclone Adaptive Observations

## Authors:

Linlin Zhang<sup>1</sup>, Bin Mu<sup>1</sup>, Shijin Yuan<sup>1</sup>, Feifan Zhou<sup>2, 3</sup>

## Date Issued:

July 20, 2018

## Certificate Verification Key:

7BEB-38E1-54F7-6319-C532

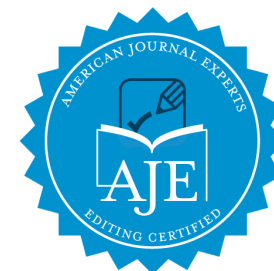

This certificate may be verified at [www.aje.com/certificate](http://www.aje.com/certificate). This document certifies that the manuscript listed above was edited for proper English language, grammar, punctuation, spelling, and overall style by one or more of the highly qualified native English speaking editors at American Journal Experts. Neither the research content nor the authors' intentions were altered in any way during the editing process. Documents receiving this certification should be English-ready for publication; however, the author has the ability to accept or reject our suggestions and changes. To verify the final AJE edited version, please visit our verification page. If you have any questions or concerns about this edited document, please contact American Journal Experts at [support@aje.com](mailto:support@aje.com).
